# Supplementary material
Source: PubMed Central journal article supplement (PMC2700302)
Supplement: NIHMS118840-supplement-Supplemental_Tables.pdf [file NIHMS118840-supplement-Supplemental_Tables.pdf]

Supplemental Table 1: Correlation analyses between [<sup>11</sup>C]PiB uptake in anatomically defined ROIs and CSF-A $\beta$ 42

| ROI                   | r      | p value<br>(uncor) | p <0.05<br>(uncor) | ROI                  | r      | p value<br>(uncor) | p <0.05<br>(uncor) |
|-----------------------|--------|--------------------|--------------------|----------------------|--------|--------------------|--------------------|
| Precentral_R          | -0,361 | 0,050              |                    | Cuneus_L             | -0,249 | 0,184              |                    |
| Precentral_L          | -0,296 | 0,112              |                    | Lingual_R            | -0,289 | 0,122              |                    |
| Frontal_Sup_R         | -0,280 | 0,133              |                    | Lingual_L            | -0,421 | 0,020              | *                  |
| Frontal_Sup_L         | -0,331 | 0,074              |                    | Occipital_Sup_R      | -0,140 | 0,461              |                    |
| Frontal_Sup_Orb_R     | -0,350 | 0,058              |                    | Occipital_Sup_L      | -0,321 | 0,083              |                    |
| Frontal_Sup_Orb_L     | -0,386 | 0,035              | *                  | Occipital_Mid_R      | -0,231 | 0,220              |                    |
| Frontal_Mid_R         | -0,358 | 0,052              |                    | Occipital_Mid_L      | -0,348 | 0,060              |                    |
| Frontal_Mid_L         | -0,388 | 0,034              | *                  | Occipital_Inf_R      | -0,210 | 0,266              |                    |
| Frontal_Mid_Orb_lat_R | -0,364 | 0,048              | *                  | Occipital_Inf_L      | -0,363 | 0,048              | *                  |
| Frontal_Mid_Orb_lat_L | -0,406 | 0,026              | *                  | Fusiform_R           | -0,377 | 0,040              | *                  |
| Frontal_Inf_Oper_R    | -0,338 | 0,068              |                    | Fusiform_L           | -0,489 | 0,006              | *                  |
| Frontal_Inf_Oper_L    | -0,260 | 0,165              |                    | Postcentral_R        | -0,344 | 0,063              |                    |
| Frontal_Inf_Tri_R     | -0,386 | 0,035              | *                  | Postcentral_L        | -0,245 | 0,192              |                    |
| Frontal_Inf_Tri_L     | -0,393 | 0,032              | *                  | Parietal_Sup_R       | -0,298 | 0,110              |                    |
| Frontal_Inf_Orb_R     | -0,360 | 0,051              |                    | Parietal_Sup_L       | -0,247 | 0,188              |                    |
| Frontal_Inf_Orb_L     | -0,354 | 0,055              |                    | Parietal_Inf_R       | -0,400 | 0,029              | *                  |
| Rolandic_Oper_R       | -0,342 | 0,064              |                    | Parietal_Inf_L       | -0,337 | 0,069              |                    |
| Rolandic_Oper_L       | -0,342 | 0,064              |                    | SupraMarginal_R      | -0,364 | 0,048              | *                  |
| Supp_Motor_Area_R     | -0,303 | 0,104              |                    | SupraMarginal_L      | -0,366 | 0,047              | *                  |
| Supp_Motor_Area_L     | -0,364 | 0,048              | *                  | Angular_R            | -0,386 | 0,035              | *                  |
| Olfactory_R           | -0,390 | 0,033              | *                  | Angular_L            | -0,319 | 0,086              |                    |
| Olfactory_L           | -0,482 | 0,007              | *                  | Precuneus_R          | -0,400 | 0,029              | *                  |
| Frontal_Sup_Medial_R  | -0,341 | 0,065              |                    | Precuneus_L          | -0,444 | 0,014              | *                  |
| Frontal_Sup_Medial_L  | -0,336 | 0,069              |                    | Paracentral_Lobule_R | -0,128 | 0,501              |                    |
| Frontal_Mid_Orb_mes_R | -0,380 | 0,038              | *                  | Paracentral_Lobule_L | -0,227 | 0,228              |                    |

|                       |        |       |   |                     |        |       |   |
|-----------------------|--------|-------|---|---------------------|--------|-------|---|
| Frontal_Mid_Orb_mes_L | -0,407 | 0,026 | * | Caudate_R           | -0,455 | 0,011 | * |
| Rectus_R              | -0,347 | 0,061 |   | Caudate_L           | -0,459 | 0,011 | * |
| Rectus_L              | -0,425 | 0,019 | * | Putamen_R           | -0,300 | 0,107 |   |
| Insula_R              | -0,353 | 0,055 |   | Putamen_L           | -0,323 | 0,081 |   |
| Insula_L              | -0,408 | 0,025 | * | Pallidum_R          | -0,307 | 0,099 |   |
| Cingulum_Ant_R        | -0,421 | 0,021 | * | Pallidum_L          | -0,075 | 0,692 |   |
| Cingulum_Ant_L        | -0,381 | 0,038 | * | Thalamus_R          | -0,460 | 0,011 | * |
| Cingulum_Mid_R        | -0,378 | 0,039 | * | Thalamus_L          | -0,508 | 0,004 | * |
| Cingulum_Mid_L        | -0,436 | 0,016 | * | Heschl_R            | -0,398 | 0,029 | * |
| Cingulum_Post_R       | -0,495 | 0,005 | * | Heschl_L            | -0,376 | 0,041 | * |
| Cingulum_Post_L       | -0,569 | 0,001 | * | Temporal_Sup_R      | -0,421 | 0,021 | * |
| Hippocampus_R         | -0,392 | 0,032 | * | Temporal_Sup_L      | -0,399 | 0,029 | * |
| Hippocampus_L         | -0,398 | 0,030 | * | Temporal_Pole_Sup_R | -0,410 | 0,024 | * |
| ParaHippocampal_R     | -0,503 | 0,005 | * | Temporal_Pole_Sup_L | -0,356 | 0,054 |   |
| ParaHippocampal_L     | -0,526 | 0,003 | * | Temporal_Mid_R      | -0,324 | 0,081 |   |
| Amygdala_R            | -0,309 | 0,097 |   | Temporal_Mid_L      | -0,382 | 0,037 | * |
| Amygdala_L            | -0,269 | 0,150 |   | Temporal_Pole_Mid_R | -0,347 | 0,060 |   |
| Calcarine_R           | -0,236 | 0,209 |   | Temporal_Pole_Mid_L | -0,309 | 0,096 |   |
| Calcarine_L           | -0,376 | 0,041 | * | Temporal_Inf_R      | -0,328 | 0,077 |   |
| Cuneus_R              | -0,207 | 0,272 |   | Temporal_Inf_L      | -0,411 | 0,024 | * |

Legend Supplemental Table 1: r: correlation coefficient (Pearson); \*: p<0,05 (uncorr);

ROI: region of interest; CSF: cerebrospinal fluid; A $\beta$ 42: Beta amyloid 1-42, L: left; R:

right

Supplemental Table 2: Local maxima: voxel based regression analysis between [<sup>11</sup>C]PiB uptake and CSF-A $\beta$ 42

| x      | y      | z      | Left/<br>Right | Cortical lobe | Region                     | BA | z-score | p-value |
|--------|--------|--------|----------------|---------------|----------------------------|----|---------|---------|
| -6.75  | -35.97 | 7.96   | Left           | Sub-lobar     | Thalamus                   | *  | 4.48    | <0.001  |
| -19.55 | -38.41 | -5.1   | Left           | Limbic Lobe   | Parahippocampal Gyrus      | 30 | 3.88    | <0.001  |
| 2.33   | -39.1  | 20.43  | Right          | Limbic Lobe   | Posterior Cingulate        | 29 | 3.69    | <0.001  |
| 39.96  | 9.08   | -12.2  | Right          | Temporal Lobe | Superior Temporal<br>Gyrus | 38 | 3.08    | 0.001   |
| 34.49  | 7.94   | -19.61 | Right          | Temporal Lobe | Superior Temporal<br>Gyrus | 38 | 2.9     | 0.002   |
| 43.56  | -0.78  | -7.67  | Right          | Temporal Lobe | Middle Temporal Gyrus      | 21 | 2.84    | 0.002   |
| -17.29 | 59.68  | -8.38  | Left           | Frontal Lobe  | Middle Frontal Gyrus       | 10 | 3.04    | 0.001   |
| 22.62  | 15.12  | 42.13  | Right          | Frontal Lobe  | Superior Frontal Gyrus     | 8  | 2.76    | 0.003   |
| -47.37 | 30.79  | 19.01  | Left           | Frontal Lobe  | Middle Frontal Gyrus       | 46 | 2.73    | 0.003   |
| -39.81 | 44.67  | 11.44  | Left           | Frontal Lobe  | Middle Frontal Gyrus       | 10 | 2.68    | 0.004   |
| -28.83 | 41.87  | 20.37  | Left           | Frontal Lobe  | Middle Frontal Gyrus       | 10 | 2.52    | 0.006   |
| 31.73  | -6.12  | 47.47  | Right          | Frontal Lobe  | Middle Frontal Gyrus       | 6  | 2.72    | 0.003   |
| 42.79  | -13.8  | 48.74  | Right          | Frontal Lobe  | Precentral Gyrus           | 4  | 2.66    | 0.004   |
| 35.43  | -31.7  | 39.71  | Right          | Parietal Lobe | Inferior Parietal Lobule   | 40 | 2.59    | 0.005   |
| 52.32  | -4.48  | 29.96  | Right          | Frontal Lobe  | Precentral Gyrus           | 6  | 2.53    | 0.006   |
| 43.07  | -2.57  | 29.99  | Right          | Frontal Lobe  | Precentral Gyrus           | 6  | 2.39    | 0.008   |
| -27.66 | -58.16 | 43.34  | Left           | Parietal Lobe | Superior Parietal Lobule   | 7  | 2.49    | 0.006   |
| -41.88 | -30.03 | 6.13   | Left           | Temporal Lobe | Superior Temporal<br>Gyrus | 41 | 2.44    | 0.007   |
| 27.21  | -0.29  | -31.32 | Right          | Limbic Lobe   | Uncus                      | 36 | 2.42    | 0.008   |
| 20.98  | 34.98  | 31.37  | Right          | Frontal Lobe  | Medial Frontal Gyrus       | 9  | 2.4     | 0.008   |
| 30.33  | 33.77  | 24.2   | Right          | Frontal Lobe  | Middle Frontal Gyrus       | 9  | 2.37    | 0.009   |
| -51.4  | -24.62 | 28.1   | Left           | Parietal Lobe | Postcentral Gyrus          | 2  | 2.38    | 0.009   |
| -29.37 | 3.16   | 50.92  | Left           | Frontal Lobe  | Middle Frontal Gyrus       | 6  | 2.38    | 0.009   |

|       |        |       |       |               |                          |    |      |       |
|-------|--------|-------|-------|---------------|--------------------------|----|------|-------|
| 55.97 | -45.15 | 22.57 | Right | Parietal Lobe | Inferior Parietal Lobule | 40 | 2.35 | 0.009 |
| -5.07 | 24.93  | 38.98 | Left  | Limbic Lobe   | Cingulate Gyrus          | 32 | 2.33 | 0.010 |
| 51.08 | 42.04  | -3.49 | Right | Frontal Lobe  | Inferior Frontal Gyrus   | 10 | 2.33 | 0.010 |
| 5.73  | -21.24 | 49.21 | Right | Frontal Lobe  | Medial Frontal Gyrus     | 6  | 2.33 | 0.010 |

Legend Supplemental Table 2: x/y/z: Talairach coordinates, BA: Brodmann Area

Supplemental Table 3: Local maxima: partial volume effect (PVE) corrected voxel based regression analysis between [<sup>11</sup>C]PiB uptake and CSF-A $\beta$ 42

| x      | y      | z      | Left/<br>Right | Cortical lobe | Region                   | BA | z-<br>score | p-value |
|--------|--------|--------|----------------|---------------|--------------------------|----|-------------|---------|
| -60.65 | -42.85 | 22.61  | Left           | Parietal Lobe | Inferior Parietal Lobule | 40 | 3.39        | <0.001  |
| -49.69 | -69.52 | 25.68  | Left           | Temporal Lobe | Middle Temporal Gyrus    | 39 | 3.28        | 0.001   |
| -55.24 | -60.35 | 28.25  | Left           | Temporal Lobe | Superior Temporal Gyrus  | 39 | 3.28        | 0.001   |
| -34.5  | 42.9   | 29.38  | Left           | Frontal Lobe  | Middle Frontal Gyrus     | 9  | 2.95        | 0.002   |
| -26.81 | 54.09  | 10.75  | Left           | Frontal Lobe  | Superior Frontal Gyrus   | 10 | 2.70        | 0.003   |
| -38.36 | 27.14  | 36.83  | Left           | Frontal Lobe  | Middle Frontal Gyrus     | 9  | 2.64        | 0.004   |
| -10.4  | -24.6  | 7.18   | Left           | Sub-lobar     | Thalamus                 | *  | 2.93        | 0.002   |
| 38.19  | -10.36 | -24.89 | Right          | Temporal Lobe | Fusiform Gyrus           | 20 | 2.90        | 0.002   |
| 40.16  | -2.22  | -31.29 | Right          | Temporal Lobe | Middle Temporal Gyrus    | 21 | 2.64        | 0.004   |
| 29.0   | -4.37  | -28.08 | Right          | Limbic Lobe   | Uncus                    | 36 | 2.42        | 0.008   |
| 15.3   | -59.14 | 13.35  | Right          | Limbic Lobe   | Posterior Cingulate      | 30 | 2.90        | 0.002   |
| 11.68  | -54.87 | 8.28   | Right          | Limbic Lobe   | Posterior Cingulate      | 30 | 2.84        | 0.002   |
| -9.05  | -30.13 | 44.51  | Left           | Limbic Lobe   | Cingulate Gyrus          | 31 | 2.82        | 0.002   |
| -21.3  | -33.98 | -11.91 | Left           | Limbic Lobe   | Parahippocampal Gyrus    | 36 | 2.75        | 0.003   |
| -26.82 | -28.19 | -13.26 | Left           | Limbic Lobe   | Parahippocampal Gyrus    | 35 | 2.75        | 0.003   |
| -24.69 | -9.69  | -29.49 | Left           | Limbic Lobe   | Uncus                    | 28 | 2.74        | 0.003   |
| 4.68   | 55.96  | 9.66   | Right          | Frontal Lobe  | Medial Frontal Gyrus     | 10 | 2.63        | 0.004   |
| 2.92   | 54.81  | 2.31   | Right          | Frontal Lobe  | Medial Frontal Gyrus     | 10 | 2.58        | 0.005   |
| 6.31   | 52.52  | 25.58  | Right          | Frontal Lobe  | Superior Frontal Gyrus   | 9  | 2.52        | 0.006   |
| 46.85  | -44.05 | 11.71  | Right          | Temporal Lobe | Superior Temporal Gyrus  | 22 | 2.62        | 0.004   |
| 43.13  | -53.35 | 10.76  | Right          | Temporal Lobe | Superior Temporal Gyrus  | 39 | 2.52        | 0.006   |
| -39.51 | 5.77   | 21.71  | Left           | Sub-lobar     | Insula                   | 13 | 2.44        | 0.007   |
| -36.36 | 13.62  | 21.17  | Left           | Frontal Lobe  | Inferior Frontal Gyrus   | 48 | 2.39        | 0.008   |
| 29.82  | -55.89 | 37.32  | Right          | Parietal Lobe | Angular Gyrus            | 39 | 2.43        | 0.008   |
| 21.38  | 56.23  | 6.36   | Right          | Frontal Lobe  | Superior Frontal Gyrus   | 10 | 2.37        | 0.009   |
| 30.54  | -26.8  | -10.36 | Right          | Temporal Lobe | Hippocampus              | *  | 2.35        | 0.009   |
| -47.05 | 4.91   | 10.94  | Left           | Frontal Lobe  | Precentral Gyrus         | 44 | 2.34        | 0.010   |

Legend Supplemental Table 3: x/y/z: Talairach coordinates, BA: Brodmann Area
